# Supplementary material
Source: PubMed Central journal article supplement (PMC6168902)
Supplement: Supplementary_Material3.pdf [file Supplementary_Material3.pdf]

## Supplementary tables

**Table 1:** Effects of injected dose, body weight and plasma glucose on measured regional tissue activity, examined by a mixed linear model representing a logarithmic transformation of equation 1.

```
> library(nlme)

> # log transforms
> LX$Logglc = log10(LX$glc)
> LX$Logwgt = log10(LX$wgt)
> LX$Logdose = log10(LX$dose)
> LX$Logvalue = log10(LX$value)

> str(LX)
'data.frame': 2176 obs. of 12 variables:
 $ ID      : Factor w/ 34 levels "h00018","h00020",...: 1 1 1 1 1 1 1 1 1 1 1 ...
 $ ROI     : Factor w/ 64 levels "Amygdala_1_sum",...: 1 2 3 4 5 6 7 8 9 10 ...
 $ Group   : Factor w/ 4 levels "AD amn","AD mixed",...: 4 4 4 4 4 4 4 4 4 4 ...
 $ value   : num  22.1 20.9 25.1 23.7 21.5 ...
 $ Age     : num  60 60 60 60 60 60 60 60 60 60 ...
 $ glc     : num  5.18 5.18 5.18 5.18 5.18 5.18 5.18 5.18 5.18 5.18 ...
 $ wgt     : num  89 89 89 89 89 89 89 89 89 89 ...
 $ dose    : num  352 352 352 352 352 ...
 $ Logglc  : num  0.714 0.714 0.714 0.714 0.714 0.714 ...
 $ Logwgt  : num  1.95 1.95 1.95 1.95 1.95 ...
 $ Logdose : num  2.55 2.55 2.55 2.55 2.55 ...
 $ Logvalue: num  1.34 1.32 1.4 1.38 1.33 ...

> lmewgt = lme(Logvalue ~ ROI + Group + Group:ROI + Logwgt +
Logdose + Logglc, data=LX, random = ~ 1|ID)

> anova(lmewgt, type = "marginal")
      numDF denDF  F-value p-value
(Intercept)      1  1890   0.02547  0.8732
ROI              63  1890  36.93920 <.0001
Group            3    27   4.55200  0.0105
Logwgt           1    27  12.81089  0.0013
Logdose          1    27   2.36434  0.1358
Logglc           1    27   1.88871  0.1806
ROI:Group       189  1890   6.51786 <.0001
```

**Table 2:** Regional metabolic main effects and interactions: data structure, R commands and statistical results. Variable “value” represents measured regional tissue activity; “valnorm” represents regional tissue activity with adjustment by body weight and injected dose (proportional to SUV as defined in eq. 1).

```
> str(LRN)
'data.frame': 2176 obs. of  9 variables:
 $ ID      : Factor w/ 34 levels "h00018","h00020",...: 1 2 3 4 5 6 7 8 9 10 ...
 $ Group   : Factor w/ 4 levels "AD amn","AD mixed",...: 4 4 4 4 4 4 4 4 4 3 ...
 $ ROI     : Factor w/ 64 levels "Amygdala_1_sum",...: 11 11 11 11 11 11 11 11 11 11
 ...
 $ value   : num  33.3 31.6 40.2 44.2 35.5 ...
 $ Age     : num  60 70 72 63 73 70 76 69 62 69 ...
 $ Scale   : num  1.308 1.511 1.278 0.894 1.403 ...
 $ Side    : Factor w/ 2 levels "L","R": 1 1 1 1 1 1 1 1 1 1 ...
 $ RName   : Factor w/ 32 levels "FL_mid_fr_G",...: 1 1 1 1 1 1 1 1 1 1 ...
 $ valnorm: num  43.6 47.7 51.4 39.5 49.9 ...
```

```
> lme4 = lme(valnorm ~ RName + Group + Side + Group:RName +
Side:RName + Side:Group, data=LRN, random = ~ 1|ID)
```

```
> anova(lme4, type="marginal")
```

|             | numDF | denDF | F-value   | p-value |
|-------------|-------|-------|-----------|---------|
| (Intercept) | 1     | 1983  | 281.38223 | <.0001  |
| ROI         | 31    | 1983  | 50.63734  | <.0001  |
| Group       | 3     | 30    | 3.02786   | 0.0447  |
| Side        | 1     | 1983  | 5.12671   | 0.0237  |
| ROI:Group   | 93    | 1983  | 11.31263  | <.0001  |
| ROI:Side    | 31    | 1983  | 0.39525   | 0.9989  |
| Group:Side  | 3     | 1983  | 11.87365  | <.0001  |

With inclusion of age as covariate:

```
> lme4A = lme(valnorm ~ RName + Group + Side + Group:RName +
Side:RName + Side:Group + Age, data=LRN, random = ~ 1|ID)
```

```
> anova(lme4A, type="marginal")
```

|             | numDF | denDF | F-value  | p-value |
|-------------|-------|-------|----------|---------|
| (Intercept) | 1     | 1983  | 17.71253 | <.0001  |
| RName       | 31    | 1983  | 50.63734 | <.0001  |
| Group       | 3     | 29    | 3.15527  | 0.0397  |
| Side        | 1     | 1983  | 5.12671  | 0.0237  |
| Age         | 1     | 29    | 0.53620  | 0.4699  |
| RName:Group | 93    | 1983  | 11.31263 | <.0001  |
| RName:Side  | 31    | 1983  | 0.39525  | 0.9989  |
| Group:Side  | 3     | 1983  | 11.87365 | <.0001  |

**Table 3:** Significance of hemispheric asymmetries

```
> library(phia)

> testInteractions(lme4, pairwise= "Side", fixed = "Group",
adjustment="fdr")

Chisq Test:
P-value adjustment method: fdr
      Value Df  Chisq Pr(>Chisq)
L-R :   AD amn -0.99923  1 15.5778  0.0001584 ***
L-R :   AD multi -1.94439  1 66.3585  1.504e-15 ***
L-R :  AD visual -0.36110  1  2.0344  0.2050396
L-R :   Control -0.07568  1  0.1005  0.7511953
---
Signif. codes:  0 '***' 0.001 '**' 0.01 '*' 0.05 '.' 0.1 ' ' 1
```

**Table 4:** Regions showing significantly reduced metabolism compared to controls (p values, corrected for multiple comparisons). Right lateral occipital metabolism was also significantly lower compared to amnesic AD, while metabolism in all other regions did not differ significantly between AD subtypes.

| ROI                               | AD amnesic | AD multidomain | AD visual |
|-----------------------------------|------------|----------------|-----------|
| PCC : L                           | 0.0053     | 0.0053         | 0.0053    |
| PCC : R                           | 0.0151     | 0.0151         | 0.0186    |
| Inferolateral parietal cortex : L |            | 0.0005         | 0.0005    |
| Inferolateral parietal cortex: R  |            | 0.0032         | 0.0006    |
| Mid-inferior temporal gyri : L    |            | 0.0186         |           |
| Lateral occipital cortex : L      |            | 0.0245         | 0.000004  |
| Lateral occipital cortex : R      |            |                | 0.000004  |
| Superior parietal gyrus : L       |            | 0.0111         | 0.0005    |
| Superior parietal gyrus : R       |            |                | 0.0006    |
| Posterior temporal lobe : L       |            | 0.0017         | 0.0011    |
| Posterior temporal lobe : R       |            | 0.0151         | 0.0016    |
| Cuneus : L                        |            |                | 0.0260    |
| Cuneus : R                        |            |                | 0.0338    |

**Table 5:** Quality of fit, heteroscedasticity (Breusch-Pagan test)

```
> res4 = residuals(lme4)
> lm3 = lm(res4 ~ LRN$RName + LRN$Group + LRN$Side)
> ncvTest(lm3)
Non-constant Variance Score Test
Variance formula: ~ fitted.values
Chisquare = 4.650134    Df = 1    p = 0.03105112
```

**Figure 1:** Plot of residuals versus fitted values

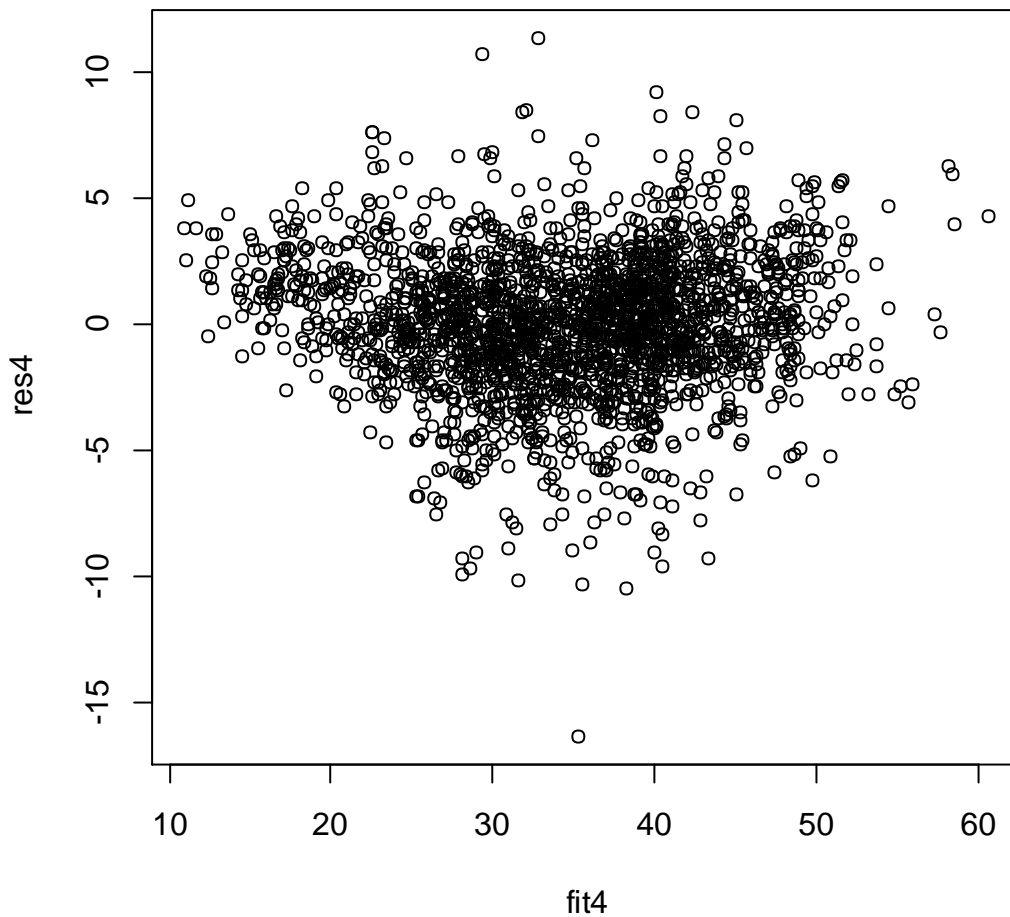

### *Interpretation*

Diagnostic procedures of the residuals did not show major deviations. The Breusch-Pagan test for heteroscedasticity of the residuals was just significant at  $P=0.03$ . A plot of the residuals versus the fitted values demonstrated that the inhomogeneity was due to slightly higher variance around the mid values rather than at the extremes, indicating that results were not influenced unduly by outliers (see supplementary table 5 and figure 1). Robustness of the significance of interactions was also confirmed by using the modification of Wald F-Tests for small samples by Kenward and Roger [1] (R modules lmer and KRmodcomp).

Kenward MG, Roger JH: **Small sample inference for fixed effects from restricted maximum likelihood**. *Biometrics* 1997, **53**(3):983-997.
